# Supplementary material for: Hydrochromic carbon dots as smart sensors for water sensing in organic solvents
Source: Royal Society of Chemistry journal article supplement (doi:10.1039/c9na00493a), 2019-01-01
Supplement: c9na00493a1.pdf [file c9na00493a1.pdf]

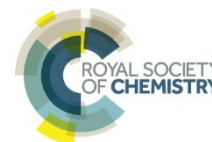

## Nanoscale Advances

### Supplementary Information

#### Hydrochromic carbon dots as smart sensors for water sensing in organic solvents

Anitha Senthamizhan<sup>\*a</sup>, Despina Fragouli<sup>\*a</sup>, Brabu Balusamy<sup>b</sup>, Bhushan Patil<sup>c</sup>, Milan Palei<sup>e</sup>, Stefania Sabella<sup>b</sup>, Tamer Uyar<sup>c,d</sup> and Athanassia Athanassiou<sup>\*a</sup>

<sup>a</sup> Smart Materials, Istituto Italiano di Tecnologia, 16163 Genova, Italy. [anitha.senthamizhan@iit.it](mailto:anitha.senthamizhan@iit.it), [dranitha35@gmail.com](mailto:dranitha35@gmail.com), [despina.fragouli@iit.it](mailto:despina.fragouli@iit.it), [athanassia.athanassiou@iit.it](mailto:athanassia.athanassiou@iit.it)

<sup>b</sup> Nanoregulatory Platform, PharmaChemistry, Department of Drug Discovery and Development, Istituto Italiano di Tecnologia, 16163 Genova, Italy

<sup>c</sup> Institute of Materials Science & Nanotechnology, Bilkent University, Ankara, 06800, Turkey

<sup>d</sup> Department of Fiber Science and Apparel Design, College of Human Ecology, Cornell University, Ithaca, NY, 14853, USA

<sup>e</sup> Nanochemistry Department, Istituto Italiano di Tecnologia, 16163 Genova, Italy

## Table of contents

| Figure No | Description                                                                         | Page No |
|-----------|-------------------------------------------------------------------------------------|---------|
| S1        | Fourier-transform infrared spectra of the carbon dots                               | 3       |
| S2        | XPS survey spectra of carbon dots                                                   | 4       |
| S3        | XRD spectra of carbon dots                                                          | 5       |
| S4        | Representative 2D excitation-emission contour map of carbon dots                    | 6       |
| S5        | Biocompatibility studies of carbon dots                                             | 7       |
| S6        | Visual colorimetric changes in the emission of CD1 in THF upon addition of water    | 8       |
| S7        | Visual colorimetric changes in the emission of CD1 in THF upon addition of pure THF | 8       |
| S8        | Selective water sensing performance of CD1/THF                                      | 9       |
| S9        | Time-resolved photoluminescence decay curves                                        | 9       |
| S10       | Excitation-emission contour maps of carbon dots in IPA and hydrated IPA             | 10      |
| S11       | Colorimetric sensing performance of hydrated Isopropyl alcohol                      | 11      |

### Supplementary Table

**Supplementary Table 1:** Comparison of the carbon dot based photoluminescent water sensor with other works.

### Supplementary Movie

**Supplementary Movie 1:** Demonstration of water sensing performance. An immediate distinguishable color change of CD1 is noticed upon exposure to water.

**Supplementary Movie 2:** Demonstration of selective water sensing performance. The IPA, as an example of polar protic solvent is introduced into CD1/THF (2 mL) to evaluate the selective sensing response towards water. There is no significant change in the emission color of the CD1.

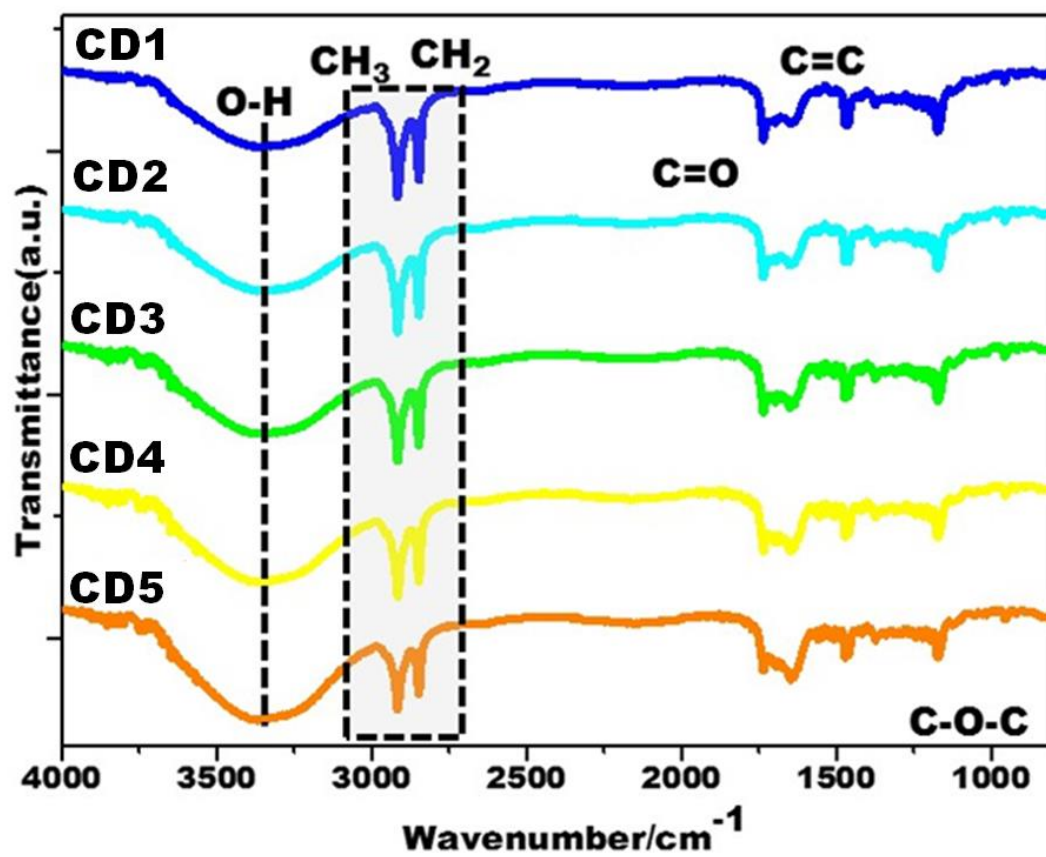

Fig. S1 Fourier-transform infrared spectra of the carbon dots.

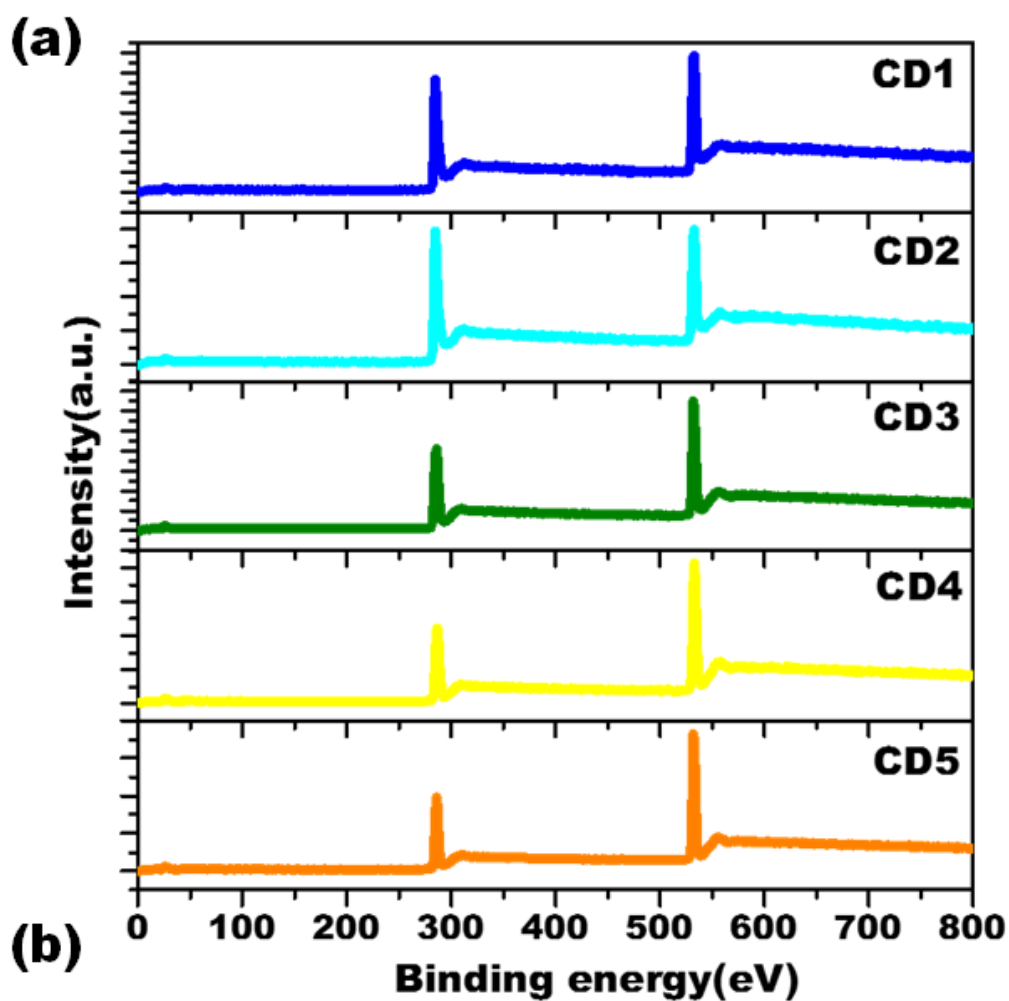

| Samples | Atomic concentration (%) |       |
|---------|--------------------------|-------|
|         | C                        | O     |
| CD1     | 71.24                    | 28.76 |
| CD2     | 73.79                    | 26.21 |
| CD3     | 66.98                    | 33.02 |
| CD4     | 60.73                    | 39.27 |
| CD5     | 61.41                    | 38.59 |

**Fig. S2** XPS survey spectra of carbon dots (a) and the table (b) containing atomic concentration of present elements (%).

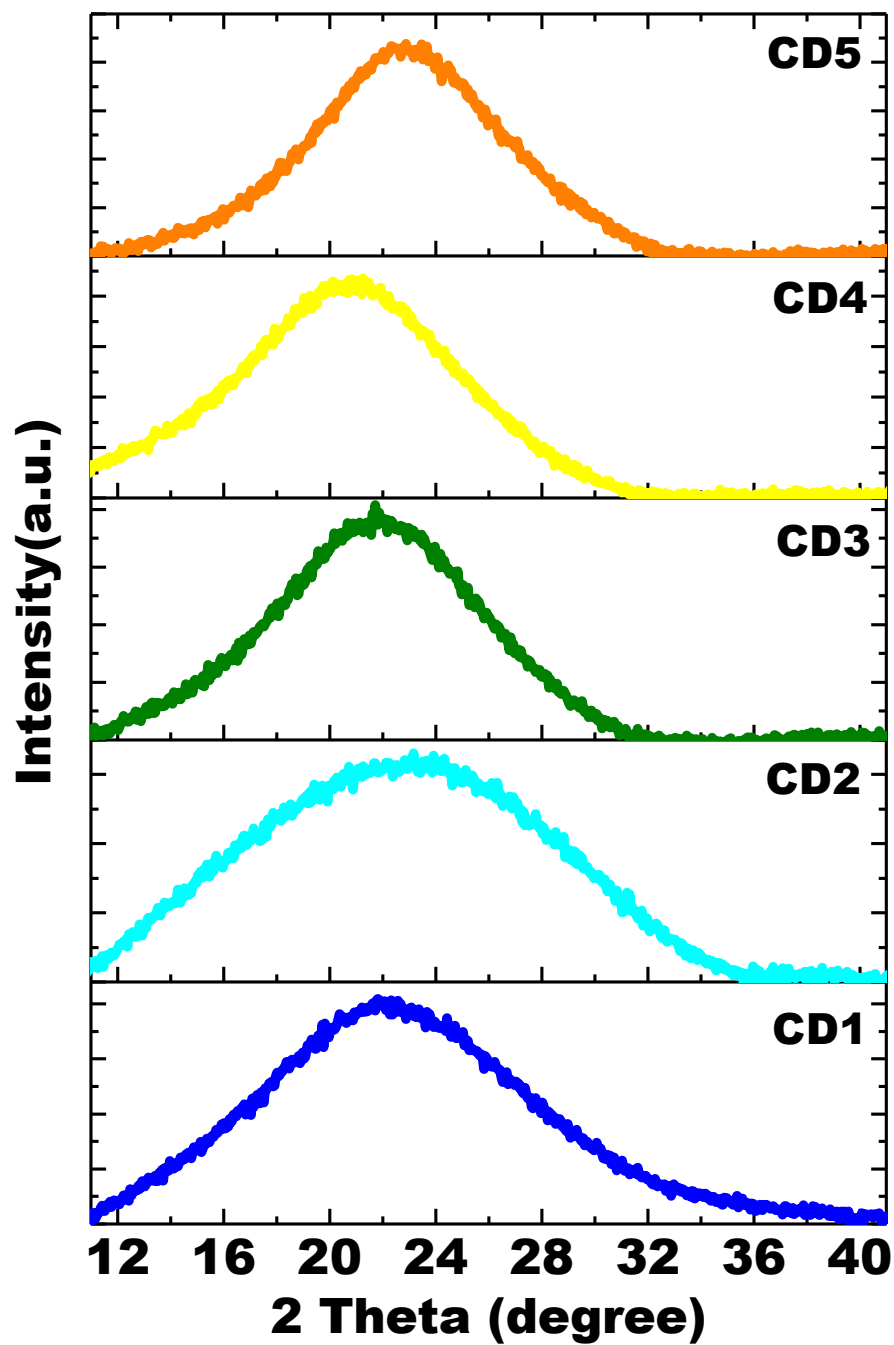

Fig. S3 XRD spectra of carbon dots.

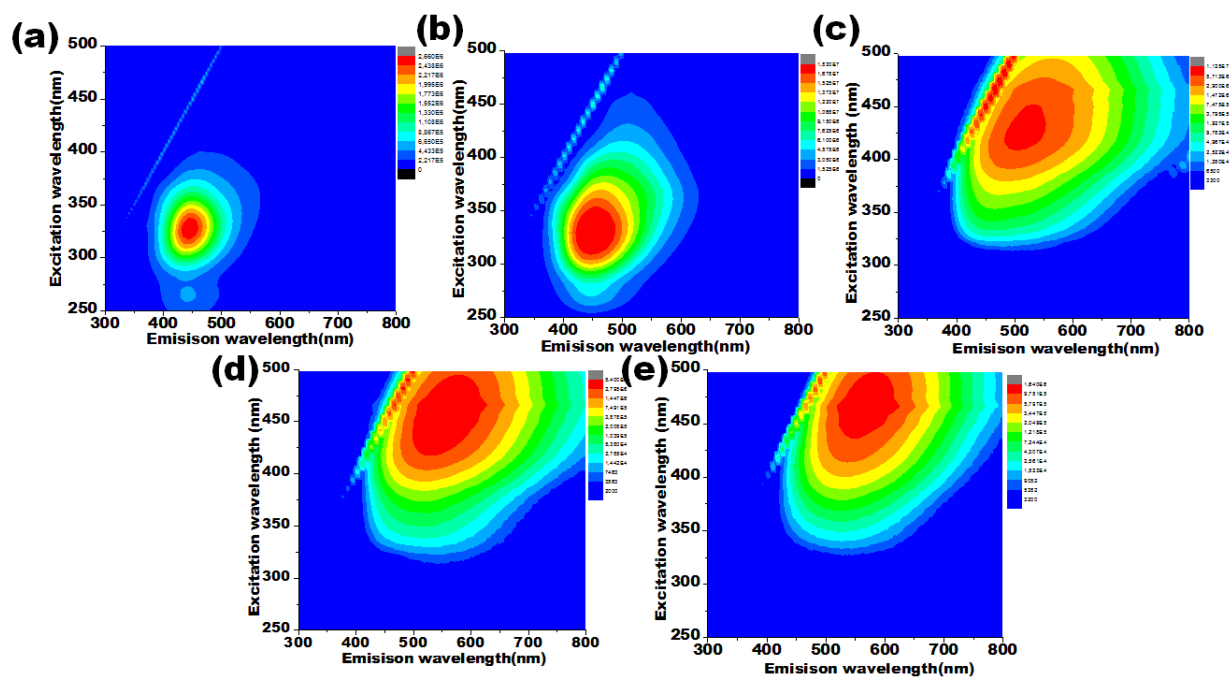

**Fig. S4** Representative 2D excitation-emission contour map of carbon dots (a) CD1 (b) CD2 (c) CD3 (d) CD4 and (e) CD5.

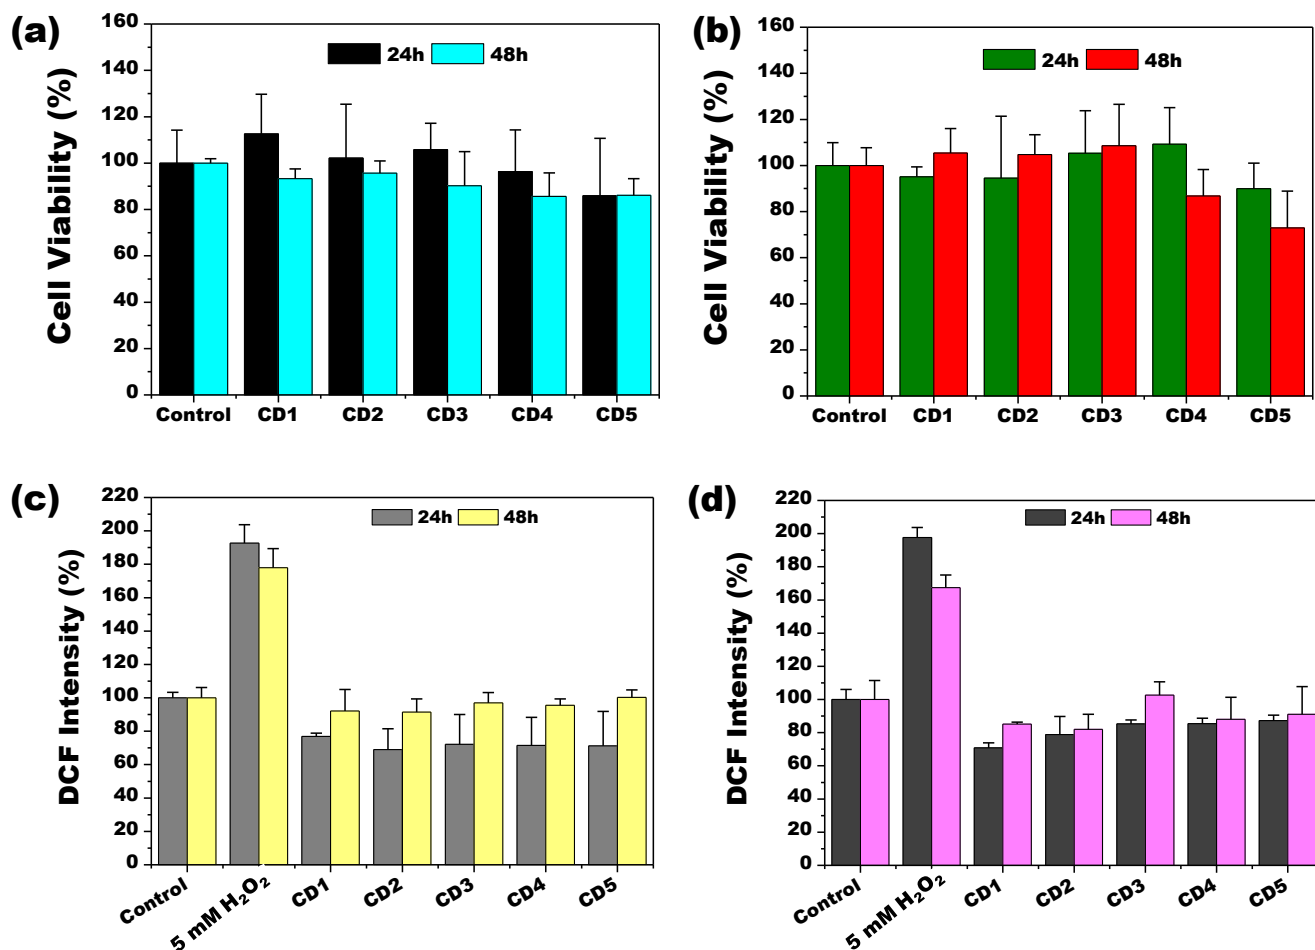

**Fig. S5** Biocompatibility studies of carbon dots. Cellular effects of carbon dots in Caco-2 human colon carcinoma cells using WST-1 cell viability and  $\text{H}_2\text{DCF-DA}$  assay at 100  $\mu\text{g/mL}$  (a&c) and 250  $\mu\text{g/mL}$  (b&d). Error bars depict  $\pm$  standard error of the mean for  $n=3$ .

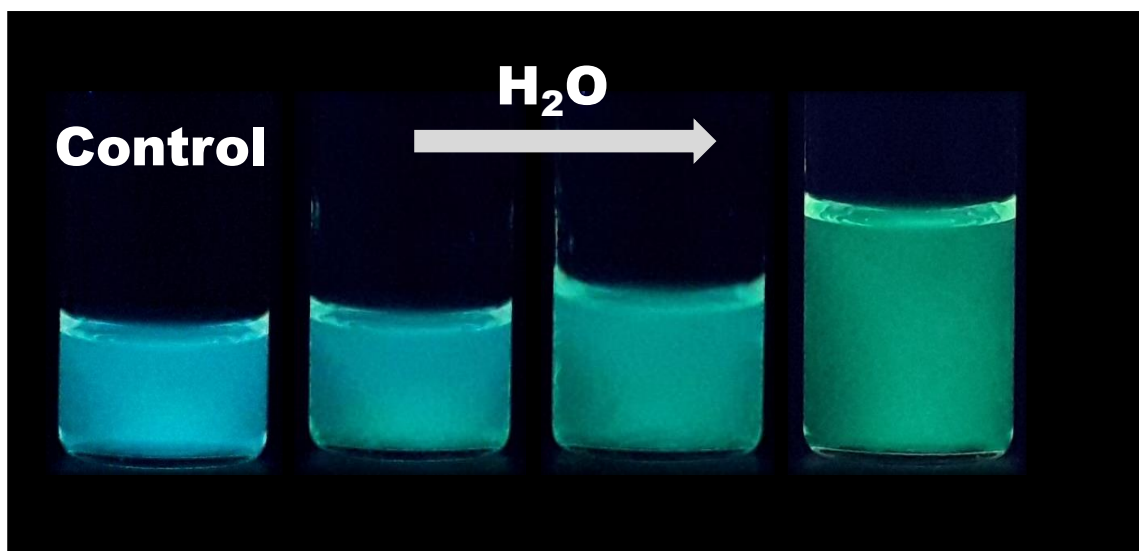

**Fig. S6** Visual colorimetric changes in the emission of CD1 in THF upon addition of water under UV light ( $\lambda_{\text{max}}$ -365 nm).

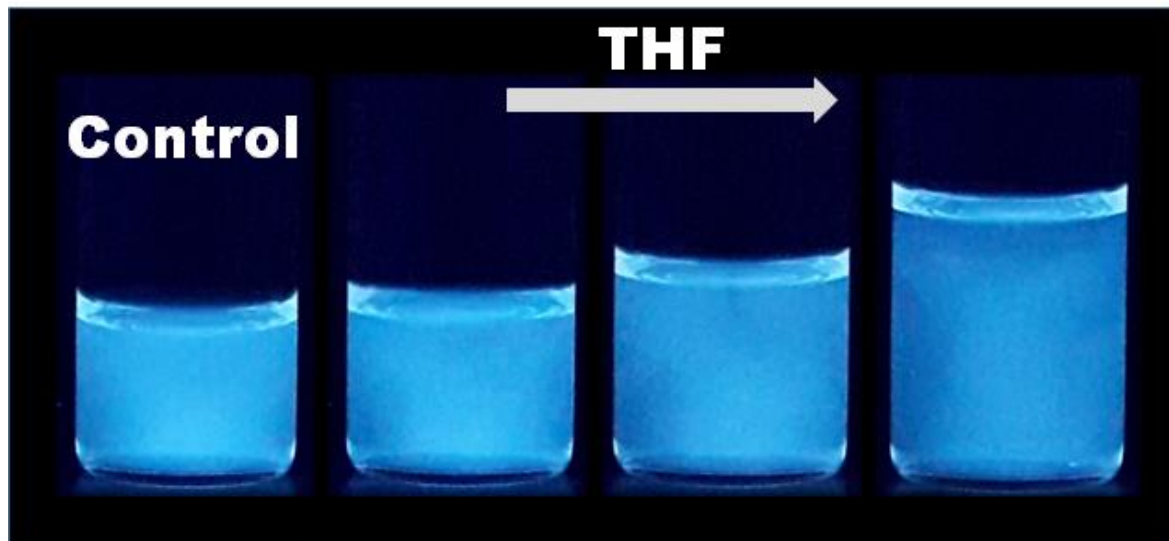

**Fig. S7** Visual colorimetric changes in the emission of CD1 in THF upon addition of pure THF under UV light ( $\lambda_{\text{max}}$ -365 nm).



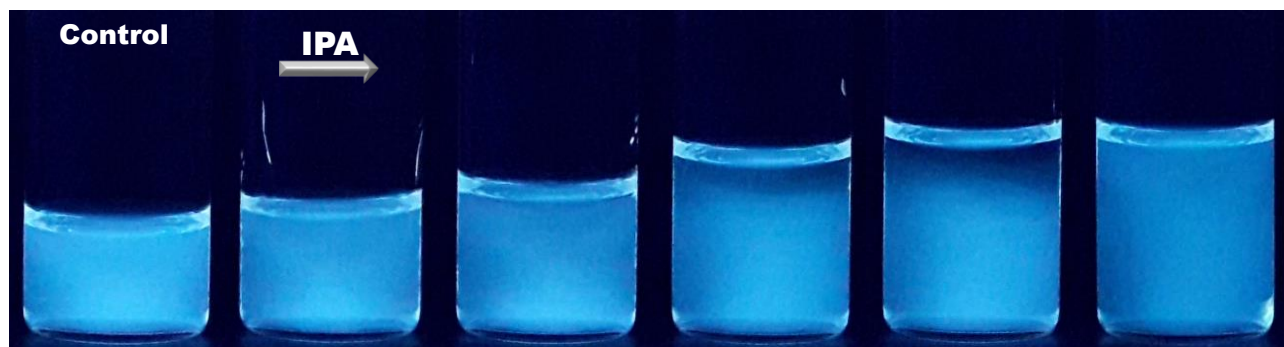

**Fig. S8** Selective water sensing performance of CD1/THF. Photograph under UV light ( $\lambda_{\text{max}}$ -365 nm) showing the carbon dots in THF (2 mL) and subsequent addition of IPA (2 mL). The observed results indicated that there is no significant chromatic transition.

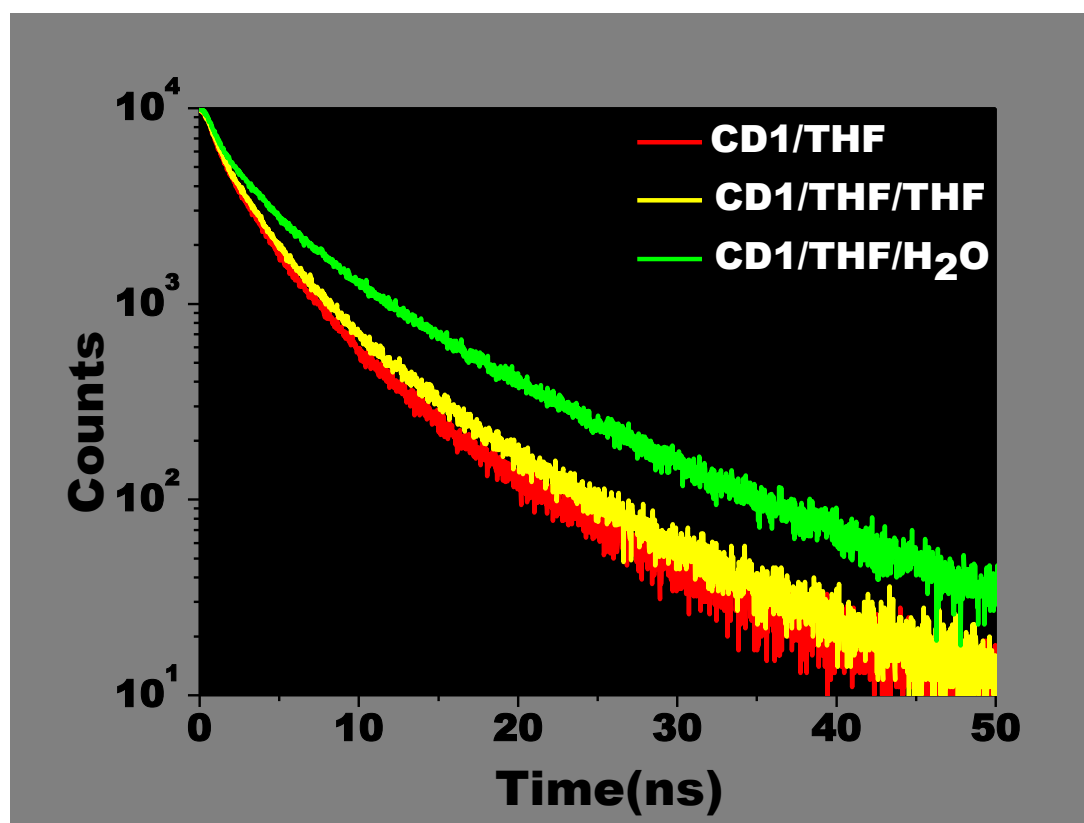

**Fig. S9** Time-resolved photoluminescence decay curves.

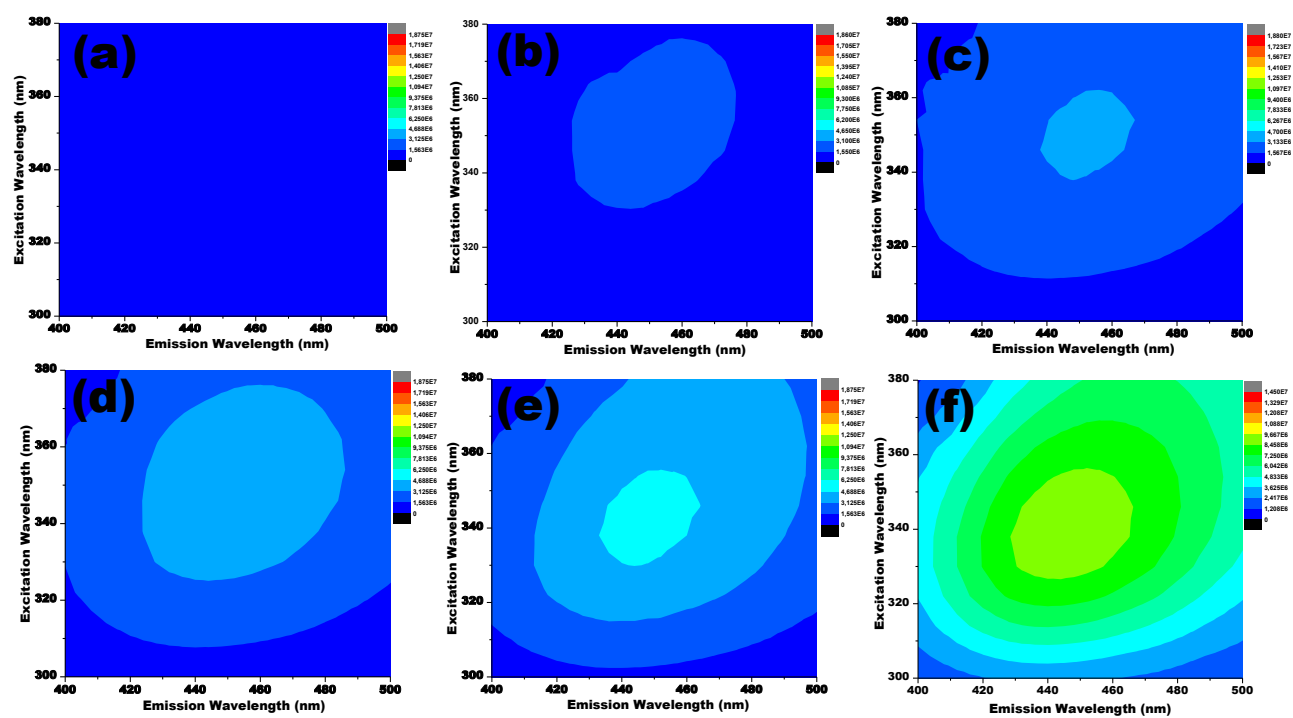

**Fig. S10** Excitation-emission contour maps of carbon dots in (a) IPA and (b-f) hydrated IPA. (b) 0.2%, v/v (c) 0.6%, v/v (d) 1.0%, v/v (e) 3.0%, v/v and (f) 5.0%, v/v.

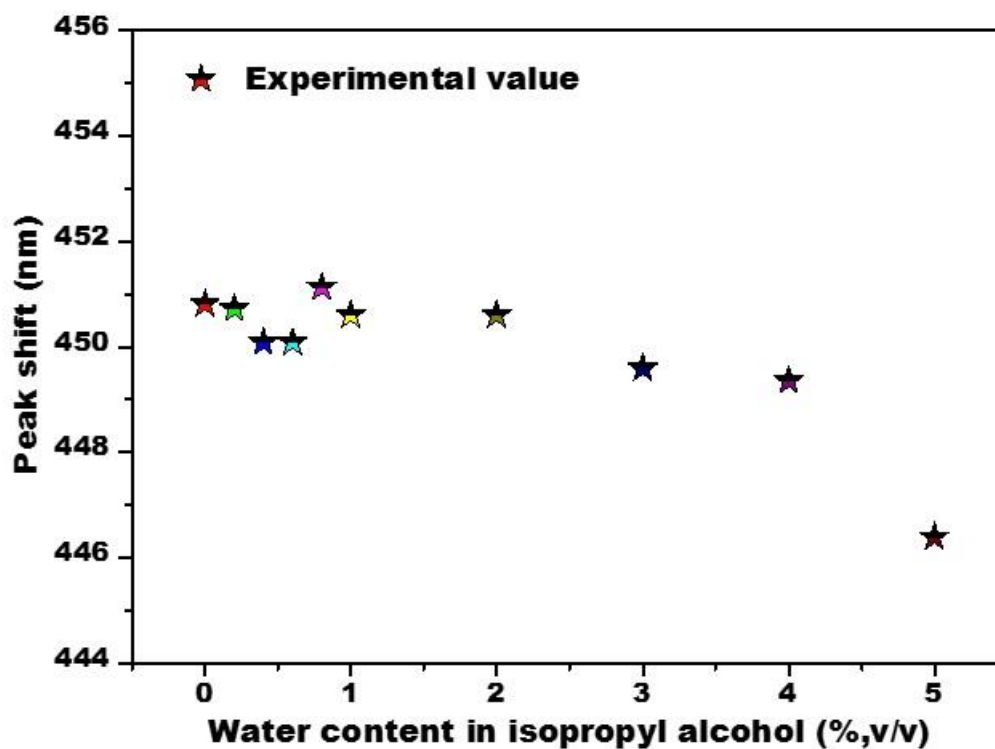

**Fig. S11** Colorimetric sensing performance of hydrated Isopropyl alcohol. PL emission spectra ( $\lambda_{\text{ex}}=330$  nm) peak shift vs water content (0.2 % to 5.0% v/v).

**Supplementary Table 1:** Comparison of the carbon dot based photoluminescent water sensor with other works.

| Material                                                                               | Change in the spectral position                                       | Visual demonstration of photo/video | Type of solvent                   | Response time           | Solvent specific response | Ref          |
|----------------------------------------------------------------------------------------|-----------------------------------------------------------------------|-------------------------------------|-----------------------------------|-------------------------|---------------------------|--------------|
| 2D oxamate-based manganese(II)-copper(II) mixed-metal-organic framework                | Increased/Shift (586 to 544 nm)                                       | No                                  | Toluene                           | Greater than 60 minutes | No                        | 1            |
| Mg <sup>2+</sup> metal-organic framework                                               | Increased/Shift                                                       | No                                  | THF, EtOH and ACN                 | 1–2 minutes             | No                        | 2            |
| 4'-N, N-dimethylamino-4-methylacryloylaminobalcone (DMC)                               | Decreased                                                             | No                                  | ethanol, acetone, and THF         | less than 90s           | No                        | 3            |
| Europium Coordination Compound (Eu(DAF) <sub>2</sub> (NO <sub>3</sub> ) <sub>3</sub> ) | Decreased                                                             | No                                  | acetonitrile                      | -                       | No                        | 4            |
| Copper nanoclusters                                                                    | Decreased                                                             | No                                  | DMSO, DMF, THF, Acetonitrile      | 20 min                  | No                        | 5            |
| Oxoporphyrinogens                                                                      | Absorption Spectra                                                    | No                                  | THF                               | -                       | No                        | 6            |
| Tetraphenylethene (TPE) derivatives                                                    | Increased                                                             | Yes                                 | THF and dioxane                   | -                       | No                        | 7            |
| Coumarin-decorated Schiff base                                                         | Increased/Shift                                                       | No                                  | DMSO                              | -                       | No                        | 8            |
| Flexible Indium(III) Metal-Organic Polyhedra Materials                                 | Decreased                                                             | Yes                                 | acetonitrile                      | -                       | No                        | 9            |
| Zn-MOF (metal-organic framework, Zn(hpi2cf)(DMF)(H <sub>2</sub> O))                    | Shift/Increased                                                       | yes                                 | THF, MeOH, Acetone, ACN and DMF   | Instantly               | No                        | 10           |
| Carbon dots                                                                            | Shift/Decreased<br>-Aprotic solvents<br>Increased-<br>Protic solvents | yes                                 | THF, IPA, ACN, Acetone and ButOH. | Instantly               | Yes                       | Current work |

## References:

1. J. Ferrando-Soria, H. Khajavi, P. Serra-Crespo, J. Gascon, F. Kapteijn, M. Julve, F. Lloret, J. Pasán, C. Ruiz-Pérez, Y. Journaux and E. Pardo, *Adv. Mater.*, 2012, **24**, 5625.
2. A. Douvali, A. C. Tsepis, S. V. Eliseeva, S. Petoud, G. S. Papaefstathiou, C. D. Malliakas, I. Papadas, G. S. Armatas, I. Margiolaki, M. G. Kanatzidis, T. Lazarides and M. J. Manos, *Angew. Chem. Int. Ed.*, 2015, **54**, 1651.
3. X. Y. Wang, C. G. Niu, L. Y. Hu, D. W. Huang, S. Q. Wu, L. Zhang, X. J. Wen and G. M. Zeng, *Sens. Actuators B Chem.*, 2017, **243**, 1046.
4. L. Song, Y. W. Wu, W. X. Chai, Y. S. Tao, C. Jiang and Q. H. Wang, *Eur. J. Inorg. Chem.*, 2015, **13**, 2264.
5. Y. Huang, W. Liu, H. Feng, Y. Ye, C. Tang, H. Ao, M. Zhao, G. Chen, J. Chen and Z. Qian, *Anal. Chem.*, 2016, **88**, 7429.
6. S. Ishihara, J. Labuta, T. Šikorský, J. V. Burda, N. Okamoto, H. Abe, K. Ariga and J. P. Hill, *Chem. Commun.*, 2012, **48**, 3933.
7. Y. Zhang, D. Li, Y. Li and J. Yu, *Chem. Sci.*, 2014, **5**, 2710.
8. W. Y. Kim, H. Shi, H. S. Jung, D. Cho, P. Verwilst, J. Y. Lee and J. S. Kim, *Chem. Commun.*, 2016, **52**, 8675.
9. X. Du, R. Fan, L. Qiang, Y. Song, K. Xing, W. Chen, P. Wang and Y. Yang, *Inorg. Chem.*, 2017, **56**, 3429.
10. L. Chen, J. W. Ye, H. P. Wang, M. Pan, S. Y. Yin, Z. W. Wei, L. Y. Zhang, K. Wu, Y. N. Fan and C. Y. Su, *Nat. Commun.*, 2017, **8**, 15985.
